# Supplementary material for: MAV-clic: management, analysis, and visualization of clinical data
Source: Oxford University Press journal article supplement (doi:10.1093/jamiaopen/ooy052), 2018-12-29
Supplement: ooy052_supp.zip [file ooy052_supp.zip]

Archive with 3 entries (3 files):
- 1_StepByStep_MAVclic_Final_07182018.pdf
- 2_Examples_MAVclic_Final_07182018.pdf
- 3_SystemDesigns_MAVclic_Final_07182018.pdf
