# Supplementary material for: MAV-clic: management, analysis, and visualization of clinical data
Source: Oxford University Press journal article supplement (doi:10.1093/jamiaopen/ooy052), 2018-12-29
Supplement: ooy052_supp.zip [file ooy052_supp.zip › 2_Examples_MAVclic_Final_07182018.pdf]

# Analyzing Healthcare Data with MAV-clic: Example Case Studies

## Supplementary Material: “MAV-clic: Management, Analysis and Visualization of Clinical Data”

### Authors List:

Zeeshan Ahmed, PhD<sup>1</sup>,

<sup>1</sup>Department of Genetics and Genome Sciences, School of Medicine, University of Connecticut Health Center, Farmington, CT, USA;

Minjung Kim, PhD<sup>2</sup>

<sup>2</sup>The Pat and Jim Calhoun Cardiology Center, School of Medicine, University of Connecticut Health Center, Farmington, CT, USA.

Bruce T. Liang, M.D., F.A.C.C.<sup>3</sup>

<sup>3</sup>Ray Neag Distinguished Professor of Cardiovascular Biology and Medicine, School of Medicine, University of Connecticut Health Center, Farmington, CT, USA.

### Corresponding Authors:

Zeeshan Ahmed, PhD,

Assistant Professor & Assistant Director Bioinformatics Precision Medicine Program, Department of Genetics and Genome Sciences, School of Medicine, University of Connecticut Health Center, 400 Farmington Ave, Farmington, CT, 06032, USA.

Email: [zahmed@uchc.edu](mailto:zahmed@uchc.edu)

Phone: 860-679-2643

## Analyzing Healthcare Data with MAV-clic: Example Case Studies

**Zeeshan Ahmed, PhD<sup>1</sup>; Minjung Kim, PhD<sup>2</sup>; Bruce T. Liang, M.D., F.A.C.C.<sup>3</sup>**

<sup>1</sup>Department of Genetics and Genome Sciences, School of Medicine, University of Connecticut Health Center, Farmington, CT, USA; <sup>2</sup>The Pat and Jim Calhoun Cardiology Center, School of Medicine, University of Connecticut Health Center, Farmington, CT, USA. <sup>3</sup>Ray Neag Distinguished Professor of Cardiovascular Biology and Medicine, School of Medicine, University of Connecticut Health Center, Farmington, CT, USA.

### Abstract

Healthcare data includes information about patient life style, medical history, visits to the practice, lab tests, imaging test, diagnoses, medications, surgical procedures, genomics profile, consulted providers and claims. Adequate and analytic access to the health care data has potential to revolutionize the field of medicine by improving the quality and transition of care, and developing better understanding of biological mechanisms and modelling complex biological interactions by integrating and analyzing knowledge in a holistic manner. To fulfill the growing interests in implementing the health information system, MAV-clic is developed to satisfy the requirements of data owners as well as data users in the healthcare system. As the multi-database management system, it can benefit for the data owners to manage huge database from multiple sources in a centralized manner. The data having different contents, formats, styles, sizes, structures can be extracted and transformed into the normalized format and stored into the MAV-clic system with High performance computing technology. The well-organized data management features allow for data users to analyze the complex, disparate healthcare data. Analytics process in MAV-clic can help building the cohort in terms of demographic information, and time information as well as generating evidence using analytics of the patient's information along with diagnoses, medications, laboratory results. MAV-clic also offers the customized functions, which can explore the quality measures of the hospital using the EHR database, visualize the patterns of the analyzed results, and report the summary in an automated and timely manner. In this manuscript we describe the potential of MAV-clic by analyzing healthcare data and explaining with some example case studies.

Denominator:

- Numerator:

- Time interval:

- ### Step 1: Diabetes Poor Control (CMS 122)

MAV-Clic Measurement Analyzer || Feb 20, 2018 4:10:31 PM

Clinical Data Analysis Measurement Analysis Report Generation

☒ Auto ETL ☐ Click ☐ Age ☐ Marital Status ☐ Single ☐ Married ☐ Divorced ☒ All ☐ Gender ☐ Male ☐ Female ☒ All ☐ Veteran ☐ Veteran ☐ Non ☒ All ☐ Practice ☐ Region ☐ Street ☐ City ☐ County ☐ State ☐ Country ☐ Zip ☐ Language ☐ Race ☐ Religion ☐ Smoker ☐ Smoker ☐ Non ☒ All ☒ Disconnect

Summary Results Population Patients Visits Diagnosis Medications Diagnoses-Codes Providers Practices Enterprises

Diagnoses: 326 Find Patients Remove E13 & E11 & E10 & O24 Search

| diagnosis   | diagnosis | icd9cm_co | description  | alt_diag_co | alt_diag_co | recall_letter | auto_recall | legacy_da | delete_ind | note | created_by | modified_by | create_tm    | modify_tm    | row_time | user_des    |
|-------------|-----------|-----------|--------------|-------------|-------------|---------------|-------------|-----------|------------|------|------------|-------------|--------------|--------------|----------|-------------|
| 7193CBFC... | E13.00    | E13.00    | 0th diab...  |             |             |               |             |           | N          | 20   | 20         | 20          | 2015-07-1... | 2015-07-1... |          | @B19cf615   |
| 7193CBFC... | E13.01    | E13.01    | 0th diab...  |             |             |               |             |           | N          | 20   | 20         | 20          | 2015-07-1... | 2015-07-1... |          | @B0a9132... |
| 7193CBFC... | E13.10    | E13.10    | 0th diab...  |             |             |               |             |           | N          | 20   | 20         | 20          | 2015-07-1... | 2015-07-1... |          | @B76867...  |
| 7193CBFC... | E13.11    | E13.11    | 0th diab...  |             |             |               |             |           | N          | 20   | 20         | 20          | 2015-07-1... | 2015-07-1... |          | @B7156a...  |
| 7193CBFC... | E13.21    | E13.21    | Other spe... |             |             |               |             |           | N          | 20   | 20         | 20          | 2015-07-1... | 2015-07-1... |          | @B611fd...  |
| 7193CBFC... | E13.22    | E13.22    | 0th diab...  |             |             |               |             |           | N          | 20   | 20         | 20          | 2015-07-1... | 2015-07-1... |          | @B621cf...  |
| 7193CBFC... | E13.29    | E13.29    | 0th diab...  |             |             |               |             |           | N          | 20   | 20         | 20          | 2015-07-1... | 2015-07-1... |          | @B27675...  |
| 7193CBFC... | E13.311   | E13.311   | 0th diab...  |             |             |               |             |           | N          | 20   | 20         | 20          | 2015-07-1... | 2015-07-1... |          | @B9253b...  |
| 7193CBFC... | E13.319   | E13.319   | 0th diab...  |             |             |               |             |           | N          | 20   | 20         | 20          | 2015-07-1... | 2015-07-1... |          | @B103fa...  |
| 7193CBFC... | E13.321   | E13.321   | 0th diab...  |             |             |               |             |           | N          | 20   | 20         | 20          | 2015-07-1... | 2015-07-1... |          | @B15176...  |
| 7193CBFC... | E13.3212  | E13.3212  | 0th diab...  |             |             |               |             |           | N          | 341  | 341        | 341         | 2016-09-2... | 2016-09-2... |          | @B83302...  |
| 7193CBFC... | E13.3212  | E13.3212  | 0th diab...  |             |             |               |             |           | N          | 341  | 341        | 341         | 2016-09-2... | 2016-09-2... |          | @B76474...  |
| 7193CBFC... | E13.3213  | E13.3213  | 0th diab...  |             |             |               |             |           | N          | 341  | 341        | 341         | 2016-09-2... | 2016-09-2... |          | @B131f9...  |
| 7193CBFC... | E13.3219  | E13.3219  | 0th diab...  |             |             |               |             |           | N          | 341  | 341        | 341         | 2016-09-2... | 2016-09-2... |          | @B3d86e...  |
| 7193CBFC... | E13.329   | E13.329   | 0th diab...  |             |             |               |             |           | N          | 20   | 20         | 20          | 2015-07-1... | 2015-07-1... |          | @B26340...  |
| 7193CBFC... | E13.3291  | E13.3291  | 0th diab...  |             |             |               |             |           | N          | 341  | 341        | 341         | 2016-09-2... | 2016-09-2... |          | @B66941...  |
| 7193CBFC... | E13.3292  | E13.3292  | 0th diab...  |             |             |               |             |           | N          | 341  | 341        | 341         | 2016-09-2... | 2016-09-2... |          | @B61dfe...  |
| 7193CBFC... | E13.3293  | E13.3293  | 0th diab...  |             |             |               |             |           | N          | 341  | 341        | 341         | 2016-09-2... | 2016-09-2... |          | @Bcf1f4...  |
| 7193CBFC... | E13.3299  | E13.3299  | 0th diab...  |             |             |               |             |           | N          | 341  | 341        | 341         | 2016-09-2... | 2016-09-2... |          | @B10200...  |
| 7193CBFC... | E13.331   | E13.331   | 0th diab...  |             |             |               |             |           | N          | 20   | 20         | 20          | 2015-07-1... | 2015-07-1... |          | @B49885...  |
| 7193CBFC... | E13.3311  | E13.3311  | 0th diab...  |             |             |               |             |           | N          | 341  | 341        | 341         | 2016-09-2... | 2016-09-2... |          | @B219b6...  |
| 7193CBFC... | E13.3312  | E13.3312  | 0th diab...  |             |             |               |             |           |            |      |            |             |              |              |          |             |

## Step 2: Diabetes Poor Control (CMS 122)

Age: 18~ 74

MAV-Click Measurement Analyzer || Feb 20, 2018 4:25:16 PM

Clinical Data Analysis | Measurement Analysis | Report Generation

☒ Auto ETL ☐ Click ☐ Practice  ☒ Disconnect

Date: ☐ 24 Hr ☐ 7 Days ☐ 30 Days ☐ 365 Days ☒ Customize Job 11, 2018 Job 17, 2018 Patients New All

☒ Age 17 75 ☐ Marital Status ☐ Single ☐ Married ☐ Divorced ☒ All Gender ☐ Male ☐ Female ☒ All Veteran ☐ Veteran ☐ Non ☒ All

Region:  Street:  City:  County:  State:  Country:  Zip:

☐ Language: English ☐ Race: American Indian or Alaska Native ☐ Religion: African Meth Episcopal Zion ☐ Smoker: ☐ Smoker ☐ Non ☒ All

Summary Results Population Patients Visits Diagnosis Medications **Diagnoses-Codes** Providers Practices Enterprises

Diagnoses: 326

| diagnosis   | diagnosis | icd9cm_co | description  | alt_diag_co | alt_diag_co | recall_letter | auto_recall | legacy_dia | delete_ind | note | created_by | modified_by | create_tm    | modify_tm    | row_tmst | user_des     |
|-------------|-----------|-----------|--------------|-------------|-------------|---------------|-------------|------------|------------|------|------------|-------------|--------------|--------------|----------|--------------|
| 7193C8FC... | E13.00    | E13.00    | Oth diab ... |             |             |               |             |            | N          | 20   | 20         | 20          | 2015-07-1... | 2015-07-1... |          | [B@1d4fb...  |
| 7193C8FC... | E13.01    | E13.01    | Oth diab...  |             |             |               |             |            | N          | 20   | 20         | 20          | 2015-07-1... | 2015-07-1... |          | [B@1d83...   |
| 7193C8FC... | E13.10    | E13.10    | Oth diab...  |             |             |               |             |            | N          | 20   | 20         | 20          | 2015-07-1... | 2015-07-1... |          | [B@7b0da...  |
| 7193C8FC... | E13.11    | E13.11    | Oth diab...  |             |             |               |             |            | N          | 20   | 20         | 20          | 2015-07-1... | 2015-07-1... |          | [B@232eb...  |
| 7193C8FC... | E13.21    | E13.21    | Other spe... |             |             |               |             |            | N          | 20   | 20         | 20          | 2015-07-1... | 2015-07-1... |          | [B@43401...  |
| 7193C8FC... | E13.22    | E13.22    | Oth diab...  |             |             |               |             |            | N          | 20   | 20         | 20          | 2015-07-1... | 2015-07-1... |          | [B@63f19...  |
| 7193C8FC... | E13.29    | E13.29    | Oth diab...  |             |             |               |             |            | N          | 20   | 20         | 20          | 2015-07-1... | 2015-07-1... |          | [B@62933...  |
| 7193C8FC... | E13.311   | E13.311   | Oth diab...  |             |             |               |             |            | N          | 20   | 20         | 20          | 2015-07-1... | 2015-07-1... |          | [B@34ebc...  |
| 7193C8FC... | E13.319   | E13.319   | Oth diab...  |             |             |               |             |            | N          | 20   | 20         | 20          | 2015-07-1... | 2015-07-1... |          | [B@773b9...  |
| 7193C8FC... | E13.321   | E13.321   | Oth diab...  |             |             |               |             |            | N          | 20   | 20         | 20          | 2015-07-1... | 2015-07-1... |          | [B@187d0...  |
| 7193C8FC... | E13.3211  | E13.3211  | Oth diab...  |             |             |               |             |            | N          | 341  | 341        | 341         | 2016-09-2... | 2016-09-2... |          | [B@63235...  |
| 7193C8FC... | E13.3212  | E13.3212  | Oth diab ... |             |             |               |             |            | N          | 341  | 341        | 341         | 2016-09-2... | 2016-09-2... |          | [B@9c9afdc   |
| 7193C8FC... | E13.3213  | E13.3213  | Oth diab...  |             |             |               |             |            | N          | 341  | 341        | 341         | 2016-09-2... | 2016-09-2... |          | [B@228b4...  |
| 7193C8FC... | E13.3219  | E13.3219  | Oth diab...  |             |             |               |             |            | N          | 341  | 341        | 341         | 2016-09-2... | 2016-09-2... |          | [B@3cb62...  |
| 7193C8FC... | E13.329   | E13.329   | Oth diab...  |             |             |               |             |            | N          | 20   | 20         | 20          | 2015-07-1... | 2015-07-1... |          | [B@45193...  |
| 7193C8FC... | E13.3291  | E13.3291  | Oth diab ... |             |             |               |             |            | N          | 341  | 341        | 341         | 2016-09-2... | 2016-09-2... |          | [B@1eacdc    |
| 7193C8FC... | E13.3292  | E13.3292  | Oth diab ... |             |             |               |             |            | N          | 341  | 341        | 341         | 2016-09-2... | 2016-09-2... |          | [B@7948...   |
| 7193C8FC... | E13.3293  | E13.3293  | Oth diab ... |             |             |               |             |            | N          | 341  | 341        | 341         | 2016-09-2... | 2016-09-2... |          | [B@748db...  |
| 7193C8FC... | E13.3299  | E13.3299  | Oth diab ... |             |             |               |             |            | N          | 341  | 341        | 341         | 2016-09-2... | 2016-09-2... |          | [B@78e58...  |
| 7193C8FC... | E13.331   | E13.331   | Oth diab ... |             |             |               |             |            | N          | 20   | 20         | 20          | 2015-07-1... | 2015-07-1... |          | [B@2724a...  |
| 7193C8FC... | E13.3311  | E13.3311  | Oth diab ... |             |             |               |             |            | N          | 341  | 341        | 341         | 2016-09-2... | 2016-09-2... |          | [B@72e8e...  |
| 7193C8FC... | E13.3312  | E13.3312  | Oth diab ... |             |             |               |             |            | N          | 341  | 341        | 341         | 2016-09-2... | 2016-09-2... |          | [B@6bcb4b... |
| 7193C8FC... | E13.3313  | E13.3313  | Oth diab...  |             |             |               |             |            | N          | 341  | 341        | 341         | 2016-09-2... | 2016-09-2... |          | [B@3f628...  |
| 7193C8FC... | E13.3319  | E13.3319  | Oth diab ... |             |             |               |             |            | N          | 341  | 341        | 341         | 2016-09-2... | 2016-09-2... |          | [B@356a8...  |

Measure: 1:Diabetes Version: Save Diagnoses Codes Get Diagnoses Codes

Prepared, designed and developed by Asst. Prof. Dr. Zouheir AHMED at the University of Connecticut Health Center (UConn Health), USA.

81

## Step 3: Diabetes Poor Control (CMS 122)

Date 02-11-2018 to 02-17-2018

MAV-Click Measurement Analyzer || Feb 20, 2018 4:25:16 PM

Clinical Data Analysis | Measurement Analysis | Report Generation

☒ Auto ETL ☐ Click ☐ Practice  ☒ Disconnect

Date: ☐ 24 Hr ☐ 7 Days ☐ 30 Days ☐ 365 Days ☒ Customize Job 11, 2018 Job 17, 2018 Patients New All

☒ Age 17 75 ☐ Marital Status ☐ Single ☐ Married ☐ Divorced ☒ All Gender ☐ Male ☐ Female ☒ All Veteran ☐ Veteran ☐ Non ☒ All

Region:  Street:  City:  County:  State:  Country:  Zip:

☐ Language: English ☐ Race: American Indian or Alaska Native ☐ Religion: African Meth Episcopal Zion ☐ Smoker: ☐ Smoker ☐ Non ☒ All

Summary Results Population Patients Visits Diagnosis Medications **Diagnoses-Codes** Providers Practices Enterprises

Diagnoses: 326

| diagnosis   | diagnosis | icd9cm_co | description  | alt_diag_co | alt_diag_co | recall_letter | auto_recall | legacy_dia | delete_ind | note | created_by | modified_by | create_tm    | modify_tm    | row_tmst | user_des     |
|-------------|-----------|-----------|--------------|-------------|-------------|---------------|-------------|------------|------------|------|------------|-------------|--------------|--------------|----------|--------------|
| 7193C8FC... | E13.00    | E13.00    | Oth diab ... |             |             |               |             |            | N          | 20   | 20         | 20          | 2015-07-1... | 2015-07-1... |          | [B@1d4fb...  |
| 7193C8FC... | E13.01    | E13.01    | Oth diab...  |             |             |               |             |            | N          | 20   | 20         | 20          | 2015-07-1... | 2015-07-1... |          | [B@1d83...   |
| 7193C8FC... | E13.10    | E13.10    | Oth diab...  |             |             |               |             |            | N          | 20   | 20         | 20          | 2015-07-1... | 2015-07-1... |          | [B@7b0da...  |
| 7193C8FC... | E13.11    | E13.11    | Oth diab...  |             |             |               |             |            | N          | 20   | 20         | 20          | 2015-07-1... | 2015-07-1... |          | [B@232eb...  |
| 7193C8FC... | E13.21    | E13.21    | Other spe... |             |             |               |             |            | N          | 20   | 20         | 20          | 2015-07-1... | 2015-07-1... |          | [B@43401...  |
| 7193C8FC... | E13.22    | E13.22    | Oth diab...  |             |             |               |             |            | N          | 20   | 20         | 20          | 2015-07-1... | 2015-07-1... |          | [B@63f19...  |
| 7193C8FC... | E13.29    | E13.29    | Oth diab...  |             |             |               |             |            | N          | 20   | 20         | 20          | 2015-07-1... | 2015-07-1... |          | [B@62933...  |
| 7193C8FC... | E13.311   | E13.311   | Oth diab...  |             |             |               |             |            | N          | 20   | 20         | 20          | 2015-07-1... | 2015-07-1... |          | [B@34ebc...  |
| 7193C8FC... | E13.319   | E13.319   | Oth diab...  |             |             |               |             |            | N          | 20   | 20         | 20          | 2015-07-1... | 2015-07-1... |          | [B@773b9...  |
| 7193C8FC... | E13.321   | E13.321   | Oth diab...  |             |             |               |             |            | N          | 20   | 20         | 20          | 2015-07-1... | 2015-07-1... |          | [B@187d0...  |
| 7193C8FC... | E13.3211  | E13.3211  | Oth diab...  |             |             |               |             |            | N          | 341  | 341        | 341         | 2016-09-2... | 2016-09-2... |          | [B@63235...  |
| 7193C8FC... | E13.3212  | E13.3212  | Oth diab ... |             |             |               |             |            | N          | 341  | 341        | 341         | 2016-09-2... | 2016-09-2... |          | [B@9c9afdc   |
| 7193C8FC... | E13.3213  | E13.3213  | Oth diab...  |             |             |               |             |            | N          | 341  | 341        | 341         | 2016-09-2... | 2016-09-2... |          | [B@228b4...  |
| 7193C8FC... | E13.3219  | E13.3219  | Oth diab...  |             |             |               |             |            | N          | 341  | 341        | 341         | 2016-09-2... | 2016-09-2... |          | [B@3cb62...  |
| 7193C8FC... | E13.329   | E13.329   | Oth diab...  |             |             |               |             |            | N          | 20   | 20         | 20          | 2015-07-1... | 2015-07-1... |          | [B@45193...  |
| 7193C8FC... | E13.3291  | E13.3291  | Oth diab ... |             |             |               |             |            | N          | 341  | 341        | 341         | 2016-09-2... | 2016-09-2... |          | [B@1eacdc    |
| 7193C8FC... | E13.3292  | E13.3292  | Oth diab ... |             |             |               |             |            | N          | 341  | 341        | 341         | 2016-09-2... | 2016-09-2... |          | [B@7948...   |
| 7193C8FC... | E13.3293  | E13.3293  | Oth diab ... |             |             |               |             |            | N          | 341  | 341        | 341         | 2016-09-2... | 2016-09-2... |          | [B@748db...  |
| 7193C8FC... | E13.3299  | E13.3299  | Oth diab ... |             |             |               |             |            | N          | 341  | 341        | 341         | 2016-09-2... | 2016-09-2... |          | [B@78e58...  |
| 7193C8FC... | E13.331   | E13.331   | Oth diab ... |             |             |               |             |            | N          | 20   | 20         | 20          | 2015-07-1... | 2015-07-1... |          | [B@2724a...  |
| 7193C8FC... | E13.3311  | E13.3311  | Oth diab ... |             |             |               |             |            | N          | 341  | 341        | 341         | 2016-09-2... | 2016-09-2... |          | [B@72e8e...  |
| 7193C8FC... | E13.3312  | E13.3312  | Oth diab ... |             |             |               |             |            | N          | 341  | 341        | 341         | 2016-09-2... | 2016-09-2... |          | [B@6bcb4b... |
| 7193C8FC... | E13.3313  | E13.3313  | Oth diab...  |             |             |               |             |            | N          | 341  | 341        | 341         | 2016-09-2... | 2016-09-2... |          | [B@3f628...  |
| 7193C8FC... | E13.3319  | E13.3319  | Oth diab ... |             |             |               |             |            | N          | 341  | 341        | 341         | 2016-09-2... | 2016-09-2... |          | [B@356a8...  |

Measure: 1:Diabetes Version: Save Diagnoses Codes Get Diagnoses Codes

Prepared, designed and developed by Asst. Prof. Dr. Zouheir AHMED at the University of Connecticut Health Center (UConn Health), USA.

82

## Step 4: Diabetes Poor Control (CMS 122)

Find patients

MAV-Clc Measurement Analyzer || Feb 20, 2018 4:25:16 PM

**Clinical Data Analysis | Measurement Analysis | Report Generation**

☒ Auto ETL ☐ Click ☐ Practice ☐ Refresh ☒ Disconnect

Date: ☐ 24 Hr ☐ 7 Days ☐ 30 Days ☐ 365 Days ☒ Custom ☐ 11, 2018 ☐ 17, 2018 ☐ Patients ☐ New ☒ All

Age: ☒ 17 ☐ 75 ☐ Marital Status: ☐ Single ☐ Married ☐ Divorced ☒ All ☐ Gender: ☐ Male ☐ Female ☒ All ☐ Veteran: ☐ Veteran ☐ Non ☒ All

Region:  Street:  City:  County:  State:  Country:  Zip:

Language:  Race:  Religion:  Smoker: ☐ Smoker ☐ Non ☒ All

**Summary | Results | Population | Patients | Visits | Diagnosis | Medications | Diagnoses-Codes | Providers | Practices | Enterprises**

**Diagnoses: 326**   E13 & E11 & E10 & O24 Search

| diagnosis   | diagnosis | lcd9cm_co | description  | alt_diag_co | alt_diag_co | recall_letter | auto_recall | legacy_dia | delete_ind | note | created_by | modified_by | create_tm    | modify_tm    | row_timestamp | user_des   |
|-------------|-----------|-----------|--------------|-------------|-------------|---------------|-------------|------------|------------|------|------------|-------------|--------------|--------------|---------------|------------|
| 7193C8FC... | E13.00    | E13.00    | Oth diab ... |             |             |               |             |            | N          |      | 20         | 20          | 2015-07-1... | 2015-07-1... |               | @144fb...  |
| 7193C8FC... | E13.01    | E13.01    | Oth diab...  |             |             |               |             |            | N          |      | 20         | 20          | 2015-07-1... | 2015-07-1... |               | @61d83...  |
| 7193C8FC... | E13.10    | E13.10    | Oth diab...  |             |             |               |             |            | N          |      | 20         | 20          | 2015-07-1... | 2015-07-1... |               | @790da...  |
| 7193C8FC... | E13.11    | E13.11    | Oth diab...  |             |             |               |             |            | N          |      | 20         | 20          | 2015-07-1... | 2015-07-1... |               | @232ab...  |
| 7193C8FC... | E13.21    | E13.21    | Oth diab...  |             |             |               |             |            | N          |      | 20         | 20          | 2015-07-1... | 2015-07-1... |               | @43401...  |
| 7193C8FC... | E13.22    | E13.22    | Oth diab...  |             |             |               |             |            | N          |      | 20         | 20          | 2015-07-1... | 2015-07-1... |               | @63f19...  |
| 7193C8FC... | E13.29    | E13.29    | Oth diab...  |             |             |               |             |            | N          |      | 20         | 20          | 2015-07-1... | 2015-07-1... |               | @62933...  |
| 7193C8FC... | E13.311   | E13.311   | Oth diab...  |             |             |               |             |            | N          |      | 20         | 20          | 2015-07-1... | 2015-07-1... |               | @844bc...  |
| 7193C8FC... | E13.319   | E13.319   | Oth diab...  |             |             |               |             |            | N          |      | 20         | 20          | 2015-07-1... | 2015-07-1... |               | @67739...  |
| 7193C8FC... | E13.321   | E13.321   | Oth diab...  |             |             |               |             |            | N          |      | 20         | 20          | 2015-07-1... | 2015-07-1... |               | @81870...  |
| 7193C8FC... | E13.3211  | E13.3211  | Oth diab...  |             |             |               |             |            | N          |      | 341        | 341         | 2016-09-2... | 2016-09-2... |               | @63235...  |
| 7193C8FC... | E13.3212  | E13.3212  | Oth diab...  |             |             |               |             |            | N          |      | 341        | 341         | 2016-09-2... | 2016-09-2... |               | @969afdc   |
| 7193C8FC... | E13.3213  | E13.3213  | Oth diab...  |             |             |               |             |            | N          |      | 341        | 341         | 2016-09-2... | 2016-09-2... |               | @62284...  |
| 7193C8FC... | E13.3219  | E13.3219  | Oth diab...  |             |             |               |             |            | N          |      | 341        | 341         | 2016-09-2... | 2016-09-2... |               | @3c362...  |
| 7193C8FC... | E13.329   | E13.329   | Oth diab...  |             |             |               |             |            | N          |      | 20         | 20          | 2015-07-1... | 2015-07-1... |               | @45193...  |
| 7193C8FC... | E13.3291  | E13.3291  | Oth diab...  |             |             |               |             |            | N          |      | 341        | 341         | 2016-09-2... | 2016-09-2... |               | @1eac8c    |
| 7193C8FC... | E13.3292  | E13.3292  | Oth diab...  |             |             |               |             |            | N          |      | 341        | 341         | 2016-09-2... | 2016-09-2... |               | @6794b...  |
| 7193C8FC... | E13.3293  | E13.3293  | Oth diab...  |             |             |               |             |            | N          |      | 341        | 341         | 2016-09-2... | 2016-09-2... |               | @6748db... |
| 7193C8FC... | E13.3299  | E13.3299  | Oth diab...  |             |             |               |             |            | N          |      | 341        | 341         | 2016-09-2... | 2016-09-2... |               | @678e58... |
| 7193C8FC... | E13.331   | E13.331   | Oth diab...  |             |             |               |             |            | N          |      | 20         | 20          | 2015-07-1... | 2015-07-1... |               | @62f24a... |
| 7193C8FC... | E13.3311  | E13.3311  | Oth diab...  |             |             |               |             |            | N          |      | 341        | 341         | 2016-09-2... | 2016-09-2... |               | @67246...  |
| 7193C8FC... | E13.3312  | E13.3312  | Oth diab...  |             |             |               |             |            | N          |      | 341        | 341         | 2016-09-2... | 2016-09-2... |               | @6b6c4b... |
| 7193C8FC... | E13.3313  | E13.3313  | Oth diab...  |             |             |               |             |            | N          |      | 341        | 341         | 2016-09-2... | 2016-09-2... |               | @63fe28... |
| 7193C8FC... | E13.3319  | E13.3319  | Oth diab...  |             |             |               |             |            | N          |      | 341        | 341         | 2016-09-2... | 2016-09-2... |               | @6356a8... |

Measure:  Version:

Report, designed and developed by Asst. Prof. Dr. Shashank JAIN at the University of Connecticut Health Center (UConn Health), USA.

83

## Step 5: Diabetes Poor Control (CMS 122)

Patients

MAV-Clc Measurement Analyzer || Feb 20, 2018 4:35:20 PM

**Clinical Data Analysis | Measurement Analysis | Report Generation**

☒ Auto ETL ☐ Click ☐ Practice ☐ Refresh ☒ Disconnect

Date: ☐ 24 Hr ☐ 7 Days ☐ 30 Days ☐ 365 Days ☒ Custom ☐ 11, 2018 ☐ 17, 2018 ☐ Patients ☐ New ☒ All

Age: ☒ 17 ☐ 75 ☐ Marital Status: ☐ Single ☐ Married ☐ Divorced ☒ All ☐ Gender: ☐ Male ☐ Female ☒ All ☐ Veteran: ☐ Veteran ☐ Non ☒ All

Region:  Street:  City:  County:  State:  Country:  Zip:

Language:  Race:  Religion:  Smoker: ☐ Smoker ☐ Non ☒ All

**Summary | Results | Population | Patients | Visits | Diagnosis | Medications | Diagnoses-Codes | Providers | Practices | Enterprises**

**Patients: 392**

| first_office | last_office | next_office | pharmacy    | pharmacy    | default_loc | privacy_level | suppress | preferred_p | financial_d | site_id | guar_hy |
|--------------|-------------|-------------|-------------|-------------|-------------|---------------|----------|-------------|-------------|---------|---------|
| 20120502     | 20180214    |             | EB10DE02... |             |             | N             |          |             |             | 000     | P       |
| 20100701     | 20180212    |             | 78888E03... |             |             | N             |          |             |             | 000     | P       |
| 20180212     |             |             | 8C0D0A41... |             |             | N             |          |             |             | 000     | P       |
| 20180214     |             |             | PCECC687... |             |             | N             |          |             |             | 000     | P       |
| 20180215     |             |             | 61DPEC50... | 4EC06851... |             | N             |          |             |             | 000     | P       |
| 20180214     |             |             | 0711401F... |             |             | N             |          |             |             | 000     | P       |
| 20180131     |             |             | E8050A8B... |             |             | N             |          |             |             | 000     | P       |
| 20180216     |             |             | 8A4515C6... | 4EC06851... |             | N             |          |             |             | 000     | P       |
| 20110811     | 20180214    |             | 4EC06851... | 09E3F49F... |             | N             |          |             |             | 000     | P       |
| 20180216     |             |             | E5E0A30F... |             |             | N             |          |             |             | 000     | P       |
| 20170130     |             |             | 9408F802... |             |             | N             |          |             |             | 000     | P       |
| 20120711     | 20180215    |             | 89D8847D... |             |             | N             |          |             |             | 000     | P       |
| 20101022     | 20180205    |             | FEB3EAD8... |             |             | N             |          |             |             | 000     | P       |
| 20130523     | 20180214    |             | 70B20D00... |             |             | N             |          |             |             | 000     | P       |
| 20100930     | 20180214    |             | 9FD442F4... |             |             | N             |          |             |             | 000     | P       |
| 20110402     | 20180201    |             | 2A2F8537... |             |             | N             |          |             |             | 000     | P       |
| 20120927     | 20180216    |             | 9388C820... |             |             | N             |          |             |             | 000     | P       |
| 20180214     |             |             | 88D8C7FD... |             |             | N             |          |             |             | 000     | P       |
| 20110405     | 20180216    |             | E5E0A30F... |             |             | N             |          |             |             | 000     | P       |
| 20101214     | 20180215    |             | 609C4A86... |             |             | N             |          |             |             | 000     | P       |
| 20180215     |             |             | 5898793F... |             |             | N             |          |             |             | 000     | P       |
| 20180215     |             |             | C0419862... |             |             | N             |          |             |             | 000     | P       |
| 20121214     | 20180213    |             | 83AEAF4...  |             |             | N             |          |             |             | 000     | P       |
| 20180212     |             |             | ASCAE6C...  |             |             | N             |          |             |             | 000     | P       |
| 20180214     |             |             | 24160C80... |             |             | N             |          |             |             | 000     | P       |
| 20120327     | 20180212    |             | 721370D4... |             |             | N             |          |             |             | 000     | P       |
| 20100309     | 20180214    |             | 721370D4... | 8C65FDB8... |             | N             |          |             |             | 000     | P       |

Report, designed and developed by Asst. Prof. Dr. Shashank JAIN at the University of Connecticut Health Center (UConn Health), USA.

84

86

## Step 8: Diabetes Poor Control (CMS 122)

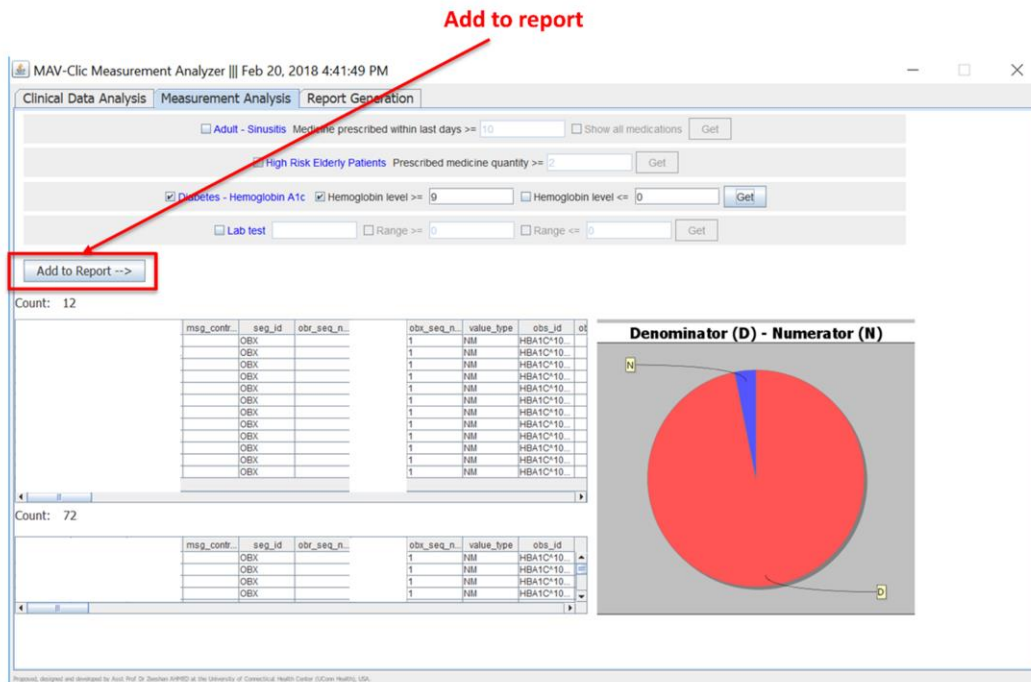

87

## Step 9: Diabetes Poor Control (CMS 122)

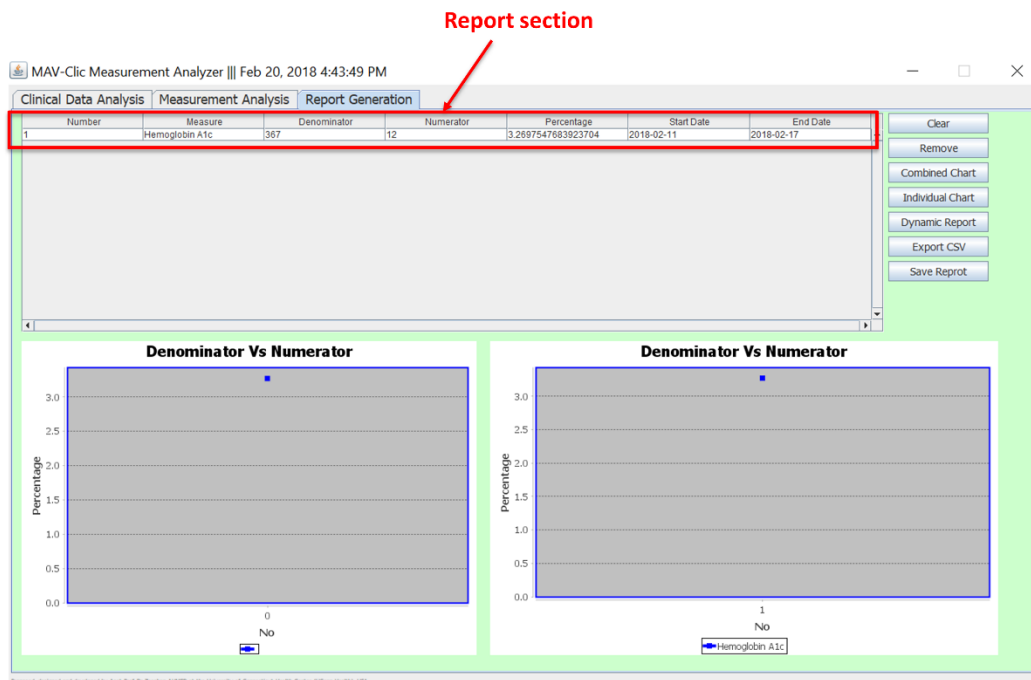

88

## Step 10: Diabetes Poor Control (CMS 122)

Generated report elements

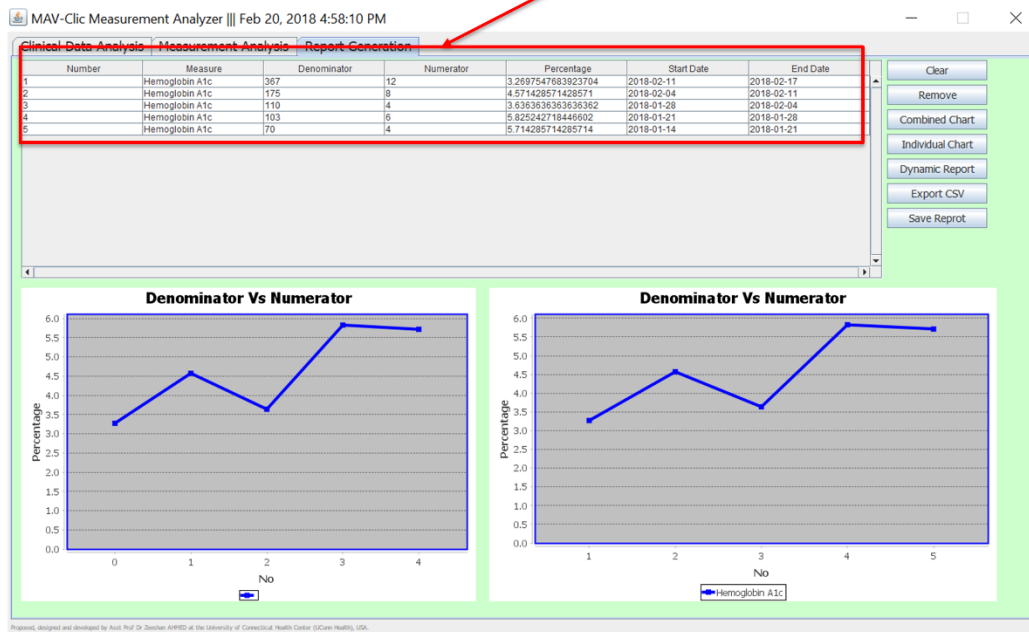

89

## Step 11: Diabetes Poor Control (CMS 122)

Export Report

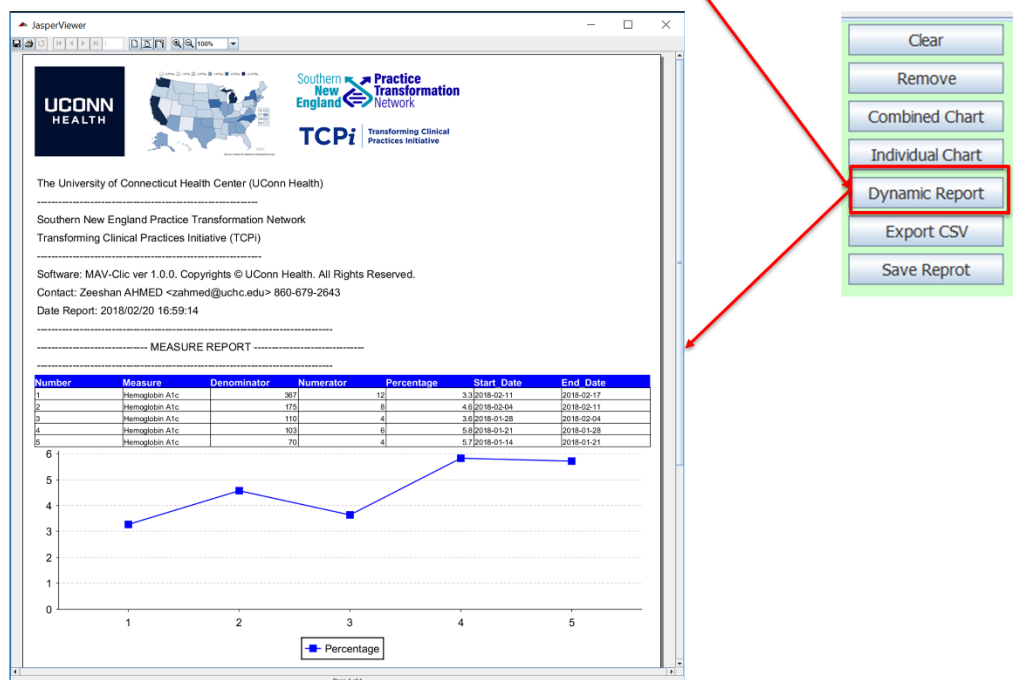

90

91

92

## Example 2: Medication search (Medication name search)

Here, we present an example to search for the elderly patients aged 65 and over who prescribe the “Tylenol” during 7 days interval (Feb/11/2018 ~ Feb/17/2018).

It consists of 5 events based steps. The main variables under considerations in this example are represented as follows:

- Cohort Building
  - Time Interval: 7 days interval (Feb/11/2018 ~ Feb/17/2018)
  - Age > 64
- Medication Search
  - Tylenol

### Step 1: Medication (Tylenol) Search

Medication Search: Tylenol

The screenshot shows the MAV-Clic Measurement Analyzer interface. The top bar indicates the date and time: Apr 4, 2018 1:53:31 PM. The main window has tabs for Clinical Data Analysis, Measurement Analysis, and Report Generation. Under Measurement Analysis, there are filters for Date (7 Days), Patients (New), and All. Below these are filters for Age, Marital Status, Gender, Veteran status, and Non status. A red box highlights the 'Disconnect' button in the left sidebar. The 'Medication' field is set to 'Tylenol' and the 'Search' button is highlighted. A red arrow points from the text 'Medication Search: Tylenol' to the 'Search' button. The bottom of the window shows a 'Measure' dropdown set to '1Diabetes' and a 'Version' dropdown.

## Step 2: Medication (Tylenol) Search

MAV-Clic Measurement Analyzer ||| Apr 4, 2018 1:49:02 PM

**Clinical Data Analysis** | **Measurement Analysis** | **Report Generation**

☒ Auto ETL ☐ Click   ☒ Disconnect

Date: ☐ 24 Hr ☐ 7 Days ☐ 30 Days ☐ 365 Days ☐ Custom  Patients: ☐ New ☒ All

Age:  Marital Status: ☐ Single ☐ Married ☐ Divorced ☒ All Gender: ☒ Male ☐ Female ☒ All Veteran: ☐ Veteran ☐ Non ☒ All

Region:  Street:  City:  County:  State:  Country:  Zip:

Language:  Race:  Religion:  Smoker: ☐ Smoker ☐ Non ☒ All

Summary | Results | Population | Patients | Visits | **Diagnosis** | **Medications** | Diagnoses-Codes | Providers | Practices | Enterprises

Medication: 10865 ☐ Date includes patients

Measure:  Version:

107

108

## Step 3: Medication (Tylenol) Search

Date: 02-11-2018 to 02-17-2018

MAV-Clic Measurement Analyzer ||| Apr 4, 2018 1:49:58 PM

**Clinical Data Analysis** | **Measurement Analysis** | **Report Generation**

☒ Auto ETL ☐ Click   ☒ Disconnect

Date: ☐ 24 Hr ☐ 7 Days ☐ 30 Days ☐ 365 Days ☒ Custom   Patients: ☐ New ☒ All

Age:  Marital Status: ☐ Single ☐ Married ☐ Divorced ☒ All Gender: ☒ Male ☐ Female ☒ All Veteran: ☐ Veteran ☐ Non ☒ All

Region:  Street:  City:  County:  State:  Country:  Zip:

Language:  Race:  Religion:  Smoker: ☐ Smoker ☐ Non ☒ All

Summary | Results | Population | Patients | Visits | **Diagnosis** | **Medications** | Diagnoses-Codes | Providers | Practices | Enterprises

Medication: 10860 ☒ Date includes patients

| file_id | auto_calc_i | prn_reason  | pdm_id       | formu_data | formu_sum | medid  | gon   | pro | medication    | source_pro | create_tm | modify_tm | supervising | ineffective | ped_order | e_coupon | e_coupon |
|---------|-------------|-------------|--------------|------------|-----------|--------|-------|-----|---------------|------------|-----------|-----------|-------------|-------------|-----------|----------|----------|
| Y       |             |             |              |            |           | 476670 | 60113 |     | TYLENOL PM    |            |           |           |             |             |           |          |          |
| Y       |             |             |              |            |           | 261893 | 4489  |     | TYLENOL       |            |           |           |             |             |           |          |          |
| Y       |             |             |              |            |           | 261893 | 4489  |     | TYLENOL       |            |           |           |             |             |           |          |          |
| Y       |             |             |              |            |           | 275706 | 4165  |     | Tylenol-C...  | EHR        | 0         | 0         | 00000000... | N           |           |          |          |
| Y       |             |             |              |            |           | 546246 | 60988 |     | Tylenol Co... | EHR        | 0         | 0         | 00000000... | N           |           |          |          |
| Y       |             | P0000000... | Non Form...  |            |           | 450581 | 22123 |     | Tylenol B...  | EHR        | 0         | 0         | 00000000... | N           |           |          |          |
| Y       |             | P0000000... | Non Form...  |            |           | 449732 | 3699  |     | Tylenol P...  | EHR        | 0         | 0         | 00000000... | N           |           |          |          |
| Y       |             |             |              |            |           | 261893 | 4489  |     | Tylenol 32... | EHR        | 0         | 0         | 00000000... | N           |           |          |          |
| Y       |             |             |              |            |           | 261893 | 4489  |     | Tylenol 32... | EHR        | 0         | 0         | 00000000... | N           |           |          |          |
| Y       |             |             |              |            |           | 275706 | 4165  |     | Tylenol C...  | EHR        | 0         | 0         | 00000000... | N           |           |          |          |
| Y       |             |             |              |            |           | 450958 | 22123 |     | Tylenol Ar... | EHR        | 0         | 0         | 00000000... | N           |           |          |          |
| Y       |             |             |              |            |           | 261893 | 4489  |     | Tylenol 32... | EHR        | 0         | 0         | 00000000... | N           |           |          |          |
| Y       |             |             |              |            |           | 261893 | 4489  |     | Tylenol 32... | EHR        | 0         | 0         | 00000000... | N           |           |          |          |
| Y       |             | P0000000... | On Formul... |            |           | 476670 | 4490  |     | Tylenol Ex... | EHR        | 0         | 0         | 00000000... | N           |           |          |          |
| Y       |             | P0000000... | On Formul... |            |           | 275706 | 4165  |     | Tylenol C...  | EHR        | 0         | 0         | 00000000... | N           |           |          |          |
| Y       |             |             |              |            |           | 261893 | 4489  |     | TYLENOL       |            |           |           |             |             |           |          |          |
| Y       |             |             |              |            |           | 261893 | 4489  |     | TYLENOL       |            |           |           |             |             |           |          |          |
| Y       |             |             |              |            |           | 476670 | 60113 |     | TYLENOL PM    |            |           |           |             |             |           |          |          |
| Y       |             |             |              |            |           | 450958 | 22123 |     | TYLENOL...    |            |           |           | 00000000... | N           |           |          |          |
| Y       |             |             |              |            |           | 275706 | 4165  |     | TYLENOL...    |            |           |           |             | N           |           |          |          |
| Y       |             |             |              |            |           | 261893 | 4489  |     | TYLENOL...    |            |           |           |             | N           |           |          |          |
| Y       |             |             |              |            |           | 275706 | 4165  |     | TYLENOL...    |            |           |           |             | N           |           |          |          |
| Y       |             | P0000000... | On Formul... |            |           | 261893 | 4489  |     | TYLENOL       |            |           |           | 00000000... | N           |           |          |          |
| Y       |             |             |              |            |           | 275706 | 4165  |     | Tylenol-C...  |            |           |           | 00000000... | N           |           |          |          |

Measure:  Version:

109

110

Check a box (Date includes patients)

### Step 5: Medication (Tylenol) Search

114

### Example 3: Medication search (NDC codes search)

This is an example to search for the elderly patients aged 65 and over who prescribe the Tylenol related NDC Codes “00450044406 && 00450048101 && 00450048211” during 7 days interval (Feb/11/2018 ~ Feb/17/2018).

It consists of 5 steps. The main variables under considerations in this example are represented as follows:

- Cohort Building
  - Time Interval: 7 days interval (Feb/11/2018 ~ Feb/17/2018)
  - Age > 64
- NDC Code Search
  - 00450044406 && 00450048101 && 00450048211
    - Tylenol related NDC Codes

#### Step 1: Medication (Tylenol related NDC Codes) Search

**NDC Codes Search: 00450044406 && 00450048101 && 00450048211**

MAV-Clic Measurement Analyzer ||| Apr 4, 2018 5:09:16 PM

Clinical Data Analysis | Measurement Analysis | Report Generation

☒ Auto ETL ☐ Click ☐ Practice  ☒ Disconnect

Date: 24 Hr 7 Days 30 Days 365 Days Custom Date Patients New All

Age Marital Status Single Married Divorced All Gender Male Female All Veteran Veteran Non All

Region Street City County State Country Zip

Language Race Religion Smoker Smoker Non All

Summary Results Population Patients Visits Diagnosis Medications Diagnoses-Codes Providers Practices Enterprises

Medication: ...

Measure Diabetes Version

### Step 3: Medication (Tylenol related NDC Codes) Search

The screenshot displays the MAV-Click Measurement Analyzer interface. At the top, the title bar reads "MAV-Click Measurement Analyzer ||| Apr 5, 2018 2:18:45 PM". Below the title bar, there are three tabs: "Clinical Data Analysis", "Measurement Analysis", and "Report Generation". The "Measurement Analysis" tab is active.

Under the "Measurement Analysis" tab, there are several filter sections:

- Auto ETL:** A checkbox that is checked.
- Date:** A dropdown menu set to "24 Hr", with other options being "7 Days", "30 Days", and "365 Days".
- Customers:** A dropdown menu set to "vs 11, 2016", with other options being "vs 17, 2016".
- Patients:** A dropdown menu set to "New", with other options being "All".
- Age:** A dropdown menu set to "54", with other options being "150".
- Marital Status:** A dropdown menu set to "Single", with other options being "Married", "Divorced", and "All".
- Gender:** A dropdown menu set to "Male", with other options being "Female", "All", "Veteran", "Non", and "All".
- Region:** A dropdown menu set to "Street", with other options being "City", "County", "State", "Country", and "Zip".
- Language:** A dropdown menu set to "English", with other options being "Spanish", "French", "German", "Italian", "Japanese", "Korean", "Portuguese", "Russian", "Vietnamese", and "Other".
- Race:** A dropdown menu set to "American Indian or Alaska Native", with other options being "Asian", "Black or African American", "Hispanic or Latino", "Native Hawaiian or Other Pacific Islander", "White", and "Other".
- Religion:** A dropdown menu set to "Christian (North American)", with other options being "Buddhist", "Hindu", "Jewish", "Muslim", "Other", "Sikh", "Taoist", "Vedant", "Yogi", and "Zoroastrian".
- Smoker:** A dropdown menu set to "Smoker", with other options being "Non-Smoker", "All", and "Non".

Below the filter sections, there are tabs for "Summary", "Results", "Population", "Patients", "Visits", "Diagnosis", "Medications", "Diagnoses-Codes", "Providers", "Practices", and "Enterprises". The "Medications" tab is active.

Under the "Medications" tab, there is a section for "Medication: 2282". Below this, there are two checkboxes: "Date includes patients" (checked) and "Find Patients" (unchecked).

Below the checkboxes, there is a table with the following columns: "id", "org\_id", "start\_date", "date\_stop", "sig\_codes", "rx\_quantity", "rx\_refills", "generic\_ok", "samples\_ind", "dispense", and "org\_refl". The table contains several rows of data, including:

| id  | org_id  | start_date | date_stop | sig_codes | rx_quantity | rx_refills | generic_ok | samples_ind | dispense | org_refl |
|-----|---------|------------|-----------|-----------|-------------|------------|------------|-------------|----------|----------|
| 180 | 55CA... | 20141021   |           |           | 0           | 0          | Y          | N           | N        |          |
| 180 | 871E... | 20141118   |           |           | 0           | 0          | Y          | N           | N        |          |
| 180 | 871E... | 20151218   |           |           | 0           | 0          | Y          | N           | N        |          |
| 180 | 871E... | 20141106   |           |           | 0           | 0          | Y          | N           | N        |          |
| 180 | 55CA... | 20140930   | 20140930  |           | 0           | 0          | Y          | N           | N        |          |
| 180 | 871E... | 20141107   |           |           | 0           | 0          | Y          | N           | N        |          |
| 180 | 55CA... | 20141001   | 20150413  |           | 0           | 0          | Y          | N           | N        |          |
| 180 | 871E... | 20141106   |           |           | 0           | 0          | Y          | N           | N        |          |
| 180 | 55CA... | 20141023   |           |           | 0           | 0          | Y          | N           | N        |          |
| 180 | 871E... | 20141106   |           |           | 0           | 0          | Y          | N           | N        |          |
| 180 | 55CA... | 20141017   | 20150727  |           | 0           | 0          | Y          | N           | N        |          |
| 180 | 55CA... | 20141017   | 20150727  |           | 0           | 0          | Y          | N           | N        |          |
| 180 | 871E... | 20141106   |           |           | 0           | 0          | Y          | N           | N        |          |
| 180 | 55CA... | 20141023   |           |           | 0           | 0          | Y          | N           | N        |          |
| 180 | 871E... | 20141106   |           |           | 0           | 0          | Y          | N           | N        |          |
| 180 | 55CA... | 20141017   | 20150727  |           | 0           | 0          | Y          | N           | N        |          |
| 180 | 871E... | 20141106   |           |           | 0           | 0          | Y          | N           | N        |          |
| 180 | 55CA... | 20141023   |           |           | 0           | 0          | Y          | N           | N        |          |
| 180 | 871E... | 20141106   |           |           | 0           | 0          | Y          | N           | N        |          |
| 180 | 55CA... | 20141017   | 20150727  |           | 0           | 0          | Y          | N           | N        |          |
| 180 | 871E... | 20141106   |           |           | 0           | 0          | Y          | N           | N        |          |
| 180 | 55CA... | 20141023   |           |           | 0           | 0          | Y          | N           | N        |          |
| 180 | 871E... | 20141106   |           |           | 0           | 0          | Y          | N           | N        |          |
| 180 | 55CA... | 20141017   | 20150727  |           | 0           | 0          | Y          | N           | N        |          |
| 180 | 871E... | 20141106   |           |           | 0           | 0          | Y          | N           | N        |          |
| 180 | 55CA... | 20141023   |           |           | 0           | 0          | Y          | N           | N        |          |
| 180 | 871E... | 20141106   |           |           | 0           | 0          | Y          | N           | N        |          |
| 180 | 55CA... | 20141017   | 20150727  |           | 0           | 0          | Y          | N           | N        |          |
| 180 | 871E... | 20141106   |           |           | 0           | 0          | Y          | N           | N        |          |
| 180 | 55CA... | 20141023   |           |           | 0           | 0          | Y          | N           | N        |          |
| 180 | 871E... | 20141106   |           |           | 0           | 0          | Y          | N           | N        |          |
| 180 | 55CA... | 20141017   | 20150727  |           | 0           | 0          | Y          | N           | N        |          |
| 180 | 871E... | 20141106   |           |           | 0           | 0          | Y          | N           | N        |          |
| 180 | 55CA... | 20141023   |           |           | 0           | 0          | Y          | N           | N        |          |
| 180 | 871E... | 20141106   |           |           | 0           | 0          | Y          | N           | N        |          |
|     |         |            |           |           |             |            |            |             |          |          |

135

## Step 4: Medication (Tylenol related NDC Codes) Search

MAV-Clic Measurement Analyzer ||| Apr 5, 2018 12:03:11 PM

Clinical Data Analysis Measurement Analysis Report Generation

☒ Auto ETL ☐ Click ☐ Practice ☐ Refresh ☒ Disconnect

Date: 24 Hr 7 Days 30 Days 365 Days ☒ Custom ☐ Job 11, 2018 ☐ Job 17, 2018 ☐ Patients ☐ New ☒ All

Age: 54 150 Marital Status: Single Married Divorced ☒ All Gender: Male Female ☒ All Veteran: Veteran Non ☒ All

Region: Street City County State Country Zip

Language: English Race: American Indian or Alaska Native Religion: African Methodist Episcopal Church ☒ Smoker: Smoker Non ☒ All

Summary Results Population Patients Visits Diagnosis Medications Diagnoses-Codes Providers Practices Enterprises

Patients: 43

| first_office | last_of | med_office | pharmacy | pharmac | default_loc | privacy_level | suppress | preferred_p | financial_d | site_id | med_rec   | guar_id | guar_type | contact_per |
|--------------|---------|------------|----------|---------|-------------|---------------|----------|-------------|-------------|---------|-----------|---------|-----------|-------------|
| 2018...      | ...     | ...        | ...      | ...     | ...         | N             |          |             |             | 000     | T01343... | SA37... | P         | 0           |
| 2018...      | ...     | ...        | ...      | ...     | ...         | N             |          |             |             | 000     | T00133... | 07C0... | P         | 0           |
| 20130321     | 2018... | ...        | ...      | ...     | ...         | N             |          |             |             | 000     | T01098... | 7C67... | P         | 2           |
| 2018...      | ...     | ...        | ...      | ...     | ...         | N             |          |             |             | 000     | T00817... | 7122... | P         | 0           |
| 2018...      | ...     | ...        | ...      | ...     | ...         | N             |          |             |             | 000     | T01269... | 93A7... | P         | 0           |
| 2017...      | ...     | ...        | ...      | ...     | ...         | N             |          |             |             | 000     | T00990... | 5480... | P         | 0           |
| 2017...      | ...     | ...        | ...      | ...     | ...         | N             |          |             |             | 000     | T01251... | FD01... | P         | 0           |
| 2016...      | ...     | ...        | ...      | ...     | ...         | N             |          |             |             | 000     | T01087... | 52P7... | P         | 0           |
| 2017...      | ...     | ...        | ...      | ...     | ...         | N             |          |             |             | 000     | T01729... | 838F... | P         | 0           |
| 2017...      | ...     | ...        | ...      | ...     | ...         | N             |          |             |             | 000     | T00708... | 1A1C... | P         | 0           |
| 2018...      | ...     | ...        | ...      | ...     | ...         | N             |          |             |             | 000     | T00791... | 5E1C... | P         | 0           |
| 2017...      | ...     | ...        | ...      | ...     | ...         | N             |          |             |             | 000     | T01455... | 72E2... | P         | 0           |
| 2017...      | ...     | ...        | ...      | ...     | ...         | N             |          |             |             | 000     | T00740... | 490E... | P         | 0           |
| 20100919     | 2017... | ...        | ...      | ...     | ...         | N             |          |             |             | 000     | T00509... | 11C9... | P         | 0           |
| 2018...      | ...     | ...        | ...      | ...     | ...         | N             |          |             |             | 000     | T01706... | 285A... | P         | 0           |
| 2017...      | ...     | ...        | ...      | ...     | ...         | N             |          |             |             | 000     | T01136... | 88CA... | P         | 0           |
| 2018...      | ...     | ...        | ...      | ...     | ...         | N             |          |             |             | 000     | T00577... | E874... | P         | 0           |
| 2017...      | ...     | ...        | ...      | ...     | ...         | N             |          |             |             | 000     | T00769... | 1A4D... | P         | 0           |
| 2017...      | ...     | ...        | ...      | ...     | ...         | N             |          |             |             | 000     | T00816... | CD4A... | P         | 0           |
| 2018...      | ...     | ...        | ...      | ...     | ...         | N             |          |             |             | 000     | T00267... | 8FC8... | P         | 0           |
| 2018...      | ...     | ...        | ...      | ...     | ...         | N             |          |             |             | 000     | T01123... | 60DA... | P         | 0           |
| 20101031     | 2017... | ...        | ...      | ...     | ...         | N             |          |             |             | 000     | T00991... | 40A8... | P         | 0           |
| 20130311     | 2017... | ...        | ...      | ...     | ...         | N             |          |             |             | 000     | T01567... | 2A3F... | P         | 0           |
| 2017...      | ...     | ...        | ...      | ...     | ...         | N             |          |             |             | 000     | T01024... | CAF2... | P         | 0           |
| 2017...      | ...     | ...        | ...      | ...     | ...         | N             |          |             |             | 000     | T00911... | F1E8... | P         | 0           |
| 2017...      | ...     | ...        | ...      | ...     | ...         | N             |          |             |             | 000     | T01794... | FC82... | P         | 0           |
| 2018...      | ...     | ...        | ...      | ...     | ...         | N             |          |             |             | 000     | T01319... | 8882... | P         | 0           |

136

## Step 5: Medication (Tylenol related NDC Codes) Search

MAV-Clic Measurement Analyzer ||| Apr 5, 2018 12:03:38 PM

Clinical Data Analysis Measurement Analysis Report Generation

☒ Auto ETL ☐ Click ☐ Practice ☐ Refresh ☒ Disconnect

Date: 24 Hr 7 Days 30 Days 365 Days ☒ Custom ☐ Job 11, 2018 ☐ Job 17, 2018 ☐ Patients ☐ New ☒ All

Age: 54 150 Marital Status: Single Married Divorced ☒ All Gender: Male Female ☒ All Veteran: Veteran Non ☒ All

Region: Street City County State Country Zip

Language: English Race: American Indian or Alaska Native Religion: African Methodist Episcopal Church ☒ Smoker: Smoker Non ☒ All

Summary Results Population Patients Visits Diagnosis Medications Diagnoses-Codes Providers Practices Enterprises

Visits: 11

| parent_enc  | case_id | billable_ind | clinical_ind | optical_ind | location_id | locked_by | lock_ind | billable_tm  | enc_status |
|-------------|---------|--------------|--------------|-------------|-------------|-----------|----------|--------------|------------|
| 00000000... | Y       | Y            | N            | N           | F4651E36... | 0         | N        | 2018-02-1... | U          |
| 00000000... | Y       | Y            | N            | N           | E897871E... | 0         | N        | 2018-02-1... | U          |
| 00000000... | Y       | Y            | N            | N           | 8700J875... | 0         | N        | 2018-02-1... | U          |
| 00000000... | Y       | Y            | N            | N           | E897871E... | 0         | N        | 2018-02-1... | U          |
| 00000000... | N       | Y            | N            | N           | 8090957A... | 0         | N        | 2018-02-1... | U          |
| 00000000... | Y       | Y            | N            | N           | C3061485... | 0         | N        | 2018-02-1... | U          |
| 00000000... | Y       | Y            | N            | N           | E897871E... | 0         | N        | 2018-02-1... | U          |
| 00000000... | Y       | Y            | N            | N           | 8700J875... | 0         | N        | 2018-02-1... | U          |
| 00000000... | Y       | Y            | N            | N           | A4E20957... | 0         | N        | 2018-02-1... | U          |
| 00000000... | Y       | Y            | N            | N           | E897871E... | 0         | N        | 2018-02-1... | U          |
| 00000000... | Y       | Y            | N            | N           | E897871E... | 0         | N        | 2018-02-1... | U          |

137

138

139

## Example 4: Practice search (Practice Location Search)

Here, we present an example to search for the elderly patients aged 65 and over who visited “Canton” practice during 7 days interval (Feb/11/2018 ~ Feb/17/2018).

It consists of 6 steps. The main variables under considerations in this example are represented as follows:

- Cohort Building
  - Time Interval: 7 days interval (Feb/11/2018 ~ Feb/17/2018)
  - Age > 64
- Practice Search: Canton

### Step 1: Practice (Canton Practice Location) Search

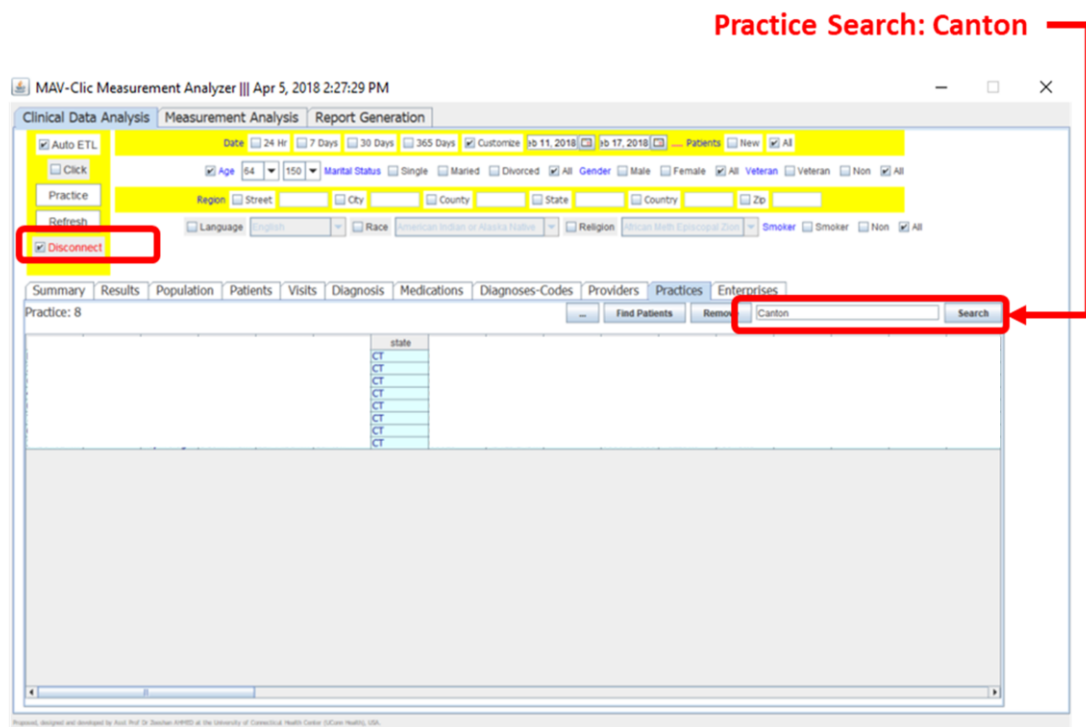

## Step 2: Practice (Canton Practice Location) Search

MAV-Clic Measurement Analyzer ||| Apr 5, 2018 12:06:06 PM

Clinical Data Analysis | Measurement Analysis | Report Generation

☒ Auto ETL ☐ Click   ☒ Disconnect

Date:        ☒ All

Age:  Marital Status:  Married ☐ Divorced ☐ All Gender: ☒ Male ☐ Female ☒ All Veteran: ☐ Veteran ☐ Non ☒ All

Region:  City:  County:  State:  Country:  Zip:

Language:  Race:  Religion:  Smoker: ☐ Smoker ☐ Non ☒ All

Summary | Results | Population | Patients | Visits | Diagnosis | Medications | Diagnoses-Codes | Providers | Practices | Enterprises

Practice:

| City   | State |
|--------|-------|
| Canton | CT    |

153

154

## Step 3: Practice (Canton Practice Location) Search

Date: 02-11-2018 to 02-17-2018

MAV-Clic Measurement Analyzer ||| Apr 5, 2018 12:09:25 PM

Clinical Data Analysis | Measurement Analysis | Report Generation

☒ Auto ETL ☐ Click   ☒ Disconnect

Date:        ☒ All

Age:  Marital Status:  Married ☐ Divorced ☐ All Gender: ☒ Male ☐ Female ☒ All Veteran: ☐ Veteran ☐ Non ☒ All

Region:  City:  County:  State:  Country:  Zip:

Language:  Race:  Religion:  Smoker: ☐ Smoker ☐ Non ☒ All

Summary | Results | Population | Patients | Visits | Diagnosis | Medications | Diagnoses-Codes | Providers | Practices | Enterprises

Practice:

| address_id  | address      | city   | state |
|-------------|--------------|--------|-------|
| UConn He... | 141 Dowd...  | Canton | CT    |
| UConn He... | 117 Alban... | Canton | CT    |
| UConn He... | 117 Alban... | Canton | CT    |
| UConn He... | 117 Alban... | Canton | CT    |

155

156

## Step 4: Practice (Canton Practice Location) Search

Check a box (Date includes patients)

Find Patients

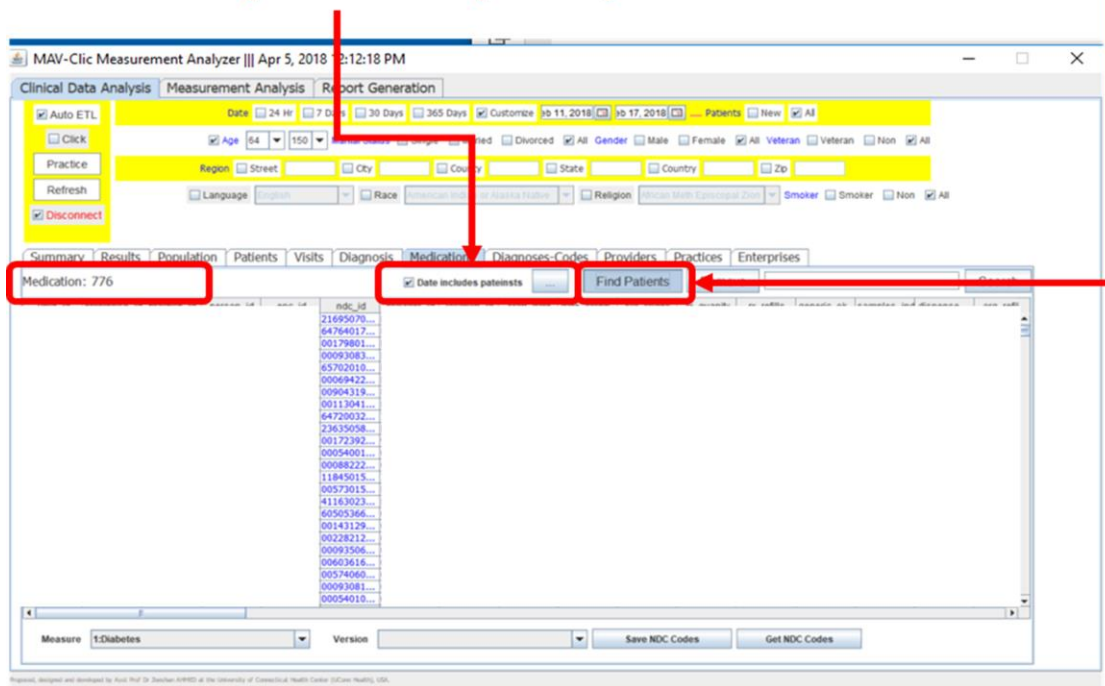

157

## Step 5: Practice (Canton Practice Location) Search

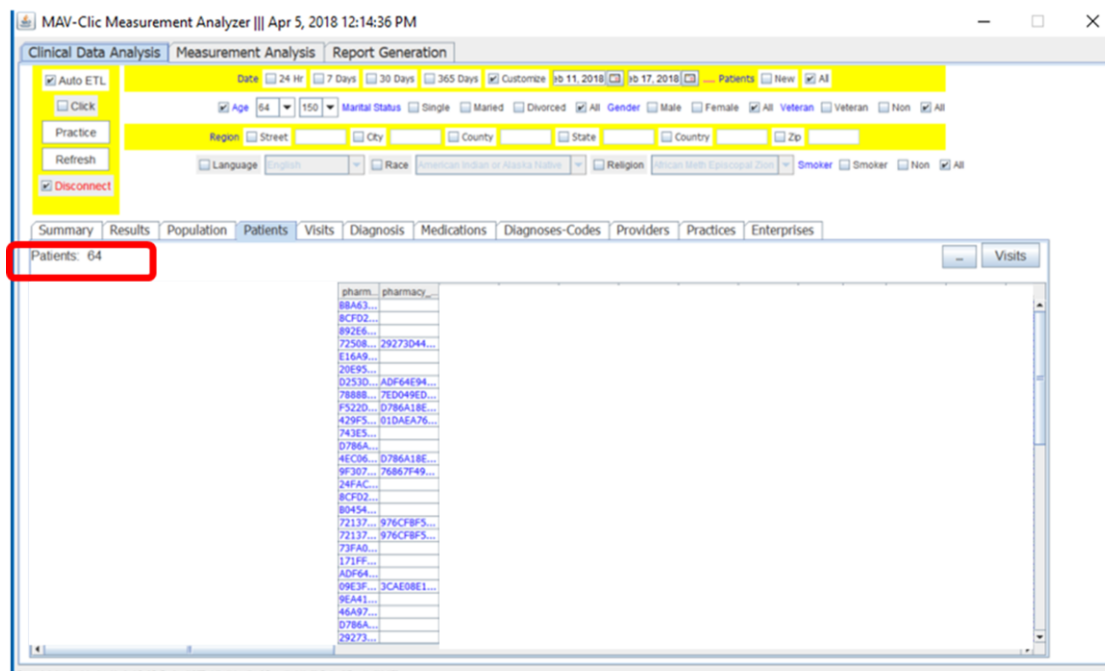

158

159

160

## Acknowledgements

We are grateful to the University of Connecticut Health Center (UConn Health), School of Medicine, Department of Genetics and Genome Sciences, Institute for Systems Genomics, The Pat and Jim Calhoun Cardiology Center, and Cardiovascular Biology and Medicine, SNE-PTN and Ahmed Lab. We appreciate all colleagues, who provided insight and expertise that greatly assisted the research and development.

## Authors and contributions

ZA perceived the idea and did all work on the software and infrastructure design and implementation and related aspects of MAV-clic. ZA and MK did analysis and performance evaluation of MAV-clic. BL guided study.
